# Supplementary material
Source: PubMed Central journal article supplement (PMC5288266)
Supplement: NIHMS843355-supplement-Table_1_-_9.pdf [file NIHMS843355-supplement-Table_1_-_9.pdf]

Supplementary Table 1. Sample sizes for each disorder group used in the analysis, separating current disorders into those with onset in the past 12 months and those with onset prior to the past 12 months

|                                    | <i>Past 12 month and prior to past 12 months, all ages</i> |         |            |          | <i>Past 12-month but not prior to past 12 months, all ages</i> |         |            |          |
|------------------------------------|------------------------------------------------------------|---------|------------|----------|----------------------------------------------------------------|---------|------------|----------|
|                                    | Total                                                      | Low (%) | Middle (%) | High (%) | Total                                                          | Low (%) | Middle (%) | High (%) |
| <i>I. Fear disorders</i>           |                                                            |         |            |          |                                                                |         |            |          |
| Specific phobia                    | 1600                                                       | 360     | 1042       | 198      | 21                                                             | 5       | 16         | --       |
| Agoraphobia                        | 217                                                        | 55      | 126        | 36       | 5                                                              | 3       | 2          | --       |
| Social phobia                      | 1273                                                       | 256     | 848        | 169      | --                                                             | --      | --         | --       |
| Panic disorder                     | 191                                                        | 35      | 136        | 20       | --                                                             | --      | --         | --       |
| No lifetime fear disorder          | 7164                                                       | 1249    | 4824       | 1091     | 7164                                                           | 1249    | 4824       | 1091     |
| <i>II. Distress disorders</i>      |                                                            |         |            |          |                                                                |         |            |          |
| Separation anxiety disorder        | 162                                                        | 42      | 107        | 13       | 12                                                             | 4       | 7          | 1        |
| Post-traumatic stress disorder     | 288                                                        | 50      | 194        | 44       | 11                                                             | 3       | 7          | 1        |
| Major depressive episode/dysthymia | 949                                                        | 182     | 638        | 129      | 47                                                             | 12      | 32         | 3        |
| Generalized anxiety disorder       | 176                                                        | 41      | 111        | 24       | 11                                                             | 3       | 7          | 1        |
| No lifetime distress disorder      | 4473                                                       | 818     | 3036       | 619      | 4473                                                           | 818     | 3036       | 619      |
| <i>III. Behavior disorders</i>     |                                                            |         |            |          |                                                                |         |            |          |
| ADHD                               | 247                                                        | 70      | 149        | 28       | 2                                                              | 1       | 1          | --       |
| Oppositional defiant disorder      | 488                                                        | 113     | 328        | 47       | 49                                                             | 10      | 32         | 7        |
| Conduct disorder                   | 333                                                        | 90      | 216        | 27       | 91                                                             | 17      | 67         | 7        |
| Eating disorders                   | 311                                                        | 76      | 195        | 40       | --                                                             | --      | --         | --       |
| No lifetime behavior disorder      | 8103                                                       | 1401    | 5483       | 1219     | 8103                                                           | 1401    | 5483       | 1219     |
| <i>IV. Substance disorders</i>     |                                                            |         |            |          |                                                                |         |            |          |
| Alcohol abuse                      | 504                                                        | 110     | 344        | 50       | 42                                                             | 11      | 26         | 5        |
| Drug abuse                         | 548                                                        | 107     | 376        | 65       | 100                                                            | 15      | 76         | 9        |
| No lifetime substance disorder     | 8912                                                       | 1620    | 5951       | 1341     | 8912                                                           | 1620    | 5951       | 1341     |
| <i>V. Other disorders</i>          |                                                            |         |            |          |                                                                |         |            |          |
| Bipolar disorder                   | 113                                                        | 32      | 69         | 12       | 5                                                              | 1       | 3          | 1        |
| No lifetime bipolar disorder       | 8831                                                       | 1591    | 5905       | 1335     | 8831                                                           | 1591    | 5905       | 1335     |

1  
2  
3  
4

Supplementary Table 2. Unadjusted mean differences in IQ by psychiatric disorder among US adolescents (N=10,073)

|                                      | <i>Past 12 month disorders, all ages</i> |      |                      | <i>Prior to past 12-month but not current disorder, all ages</i> |      |                      |
|--------------------------------------|------------------------------------------|------|----------------------|------------------------------------------------------------------|------|----------------------|
|                                      | Mean IQ                                  | SD   | p value <sup>+</sup> | Mean IQ                                                          | SD   | p value <sup>+</sup> |
| <i>I. Fear disorders</i>             |                                          |      |                      |                                                                  |      |                      |
| Specific phobia                      | 96.6                                     | 16.4 | 0.004                | 99.9                                                             | 14.3 | 0.91                 |
| Agoraphobia                          | 97.3                                     | 14.8 | 0.002                | 97.8                                                             | 15.4 | 0.47                 |
| Social phobia                        | 98.4                                     | 14.6 | 0.004                | 98                                                               | 15.4 | 0.47                 |
| Panic disorder                       | 97.9                                     | 13.9 | 0.10                 | 96.8                                                             | 14.3 | 0.47                 |
| No fear disorder                     | 100.1                                    | 14.5 | --                   | 100.1                                                            | 14.5 | --                   |
| <i>II. Distress disorders</i>        |                                          |      |                      |                                                                  |      |                      |
| Separation anxiety disorder          | 95                                       | 14.5 | 0.30                 | 97                                                               | 14.6 | 0.002                |
| Post-traumatic stress disorder**     | 100                                      | 14.3 | 0.30                 | 96.7                                                             | 14.6 | 0.17                 |
| Major depressive episode/dysthymia   | 99.5                                     | 14.6 | 0.92                 | 100                                                              | 14   | 0.55                 |
| Generalized anxiety disorder         | 98.1                                     | 16.1 | 0.92                 | 97.4                                                             | 13.3 | 0.17                 |
| No distress disorder                 | 98.1                                     | 14.4 | --                   | 99.8                                                             | 14.6 | --                   |
| <i>III. Behavior disorders</i>       |                                          |      |                      |                                                                  |      |                      |
| ADHD                                 | 96.1                                     | 16.1 | 0.002                | 96.2                                                             | 14   | 0.004                |
| Oppositional defiant disorder        | 96.6                                     | 14.9 | <.001                | 98.9                                                             | 15   | 0.14                 |
| Conduct disorder                     | 95.5                                     | 14.7 | <.001                | 96.2                                                             | 14.6 | 0.004                |
| Eating disorders                     | 97                                       | 15.1 | 0.002                | 98.2                                                             | 15   | 0.14                 |
| No behavior disorder                 | 100                                      | 14.5 | --                   | 100.1                                                            | 14.5 | --                   |
| <i>IV. Substance disorders</i>       |                                          |      |                      |                                                                  |      |                      |
| Alcohol abuse                        | 97.4                                     | 14.8 | 0.004                | 97.9                                                             | 14.8 | 0.11                 |
| Drug abuse                           | 98.3                                     | 14.3 | 0.03                 | 98.3                                                             | 13.2 | 0.11                 |
| No substance disorder                | 99.8                                     | 14.6 | --                   | 99.8                                                             | 14.6 | --                   |
| <i>V. Other disorders</i>            |                                          |      |                      |                                                                  |      |                      |
| Bipolar disorder                     | 94.8                                     | 16.2 | 0.001                | 97.1                                                             | 16.3 | 0.41                 |
| No bipolar disorder                  | 99.6                                     | 14.6 | --                   | 99.7                                                             | 14.6 | --                   |
| <i>VI. Total number of disorders</i> |                                          |      |                      |                                                                  |      |                      |
| Exactly one disorder                 | 98.7                                     | 13.6 | 0.40                 | 100.5                                                            | 14.5 | 0.10                 |
| Exactly two disorders                | 98.9                                     | 13.8 | 0.40                 | 97.7                                                             | 13.7 | 0.10                 |
| Three or more disorders              | 97.6                                     | 14.9 | 0.02                 | 96.6                                                             | 14.3 | 0.10                 |
| No disorder                          | 99.7                                     | 14.6 | --                   | 99.6                                                             | 14.6 | --                   |

\* Scores were first normed in the sample by six-month age groups for mean of 100 and standard deviation of 15.

\*\* Among those with a lifetime exposure to a potentially traumatic event (N=6160, 61.2% of the total sample)

<sup>+</sup> P-values are for the comparison between each disorder category to a reference group of no disorder in that category. For example, mean IQ among those with specific phobia is compared to those with no fear disorder. All p-values are false discovery rate adjusted.

Supplementary Table 3 - Effect size estimates of the association between fluid intelligence and psychiatric disorders in a population representation sample of adolescents (N=10,073)\*

|                                      | <i>Past 12 month disorders, all ages</i> |              | <i>Prior to past 12-month but not current disorder, all ages</i> |             |
|--------------------------------------|------------------------------------------|--------------|------------------------------------------------------------------|-------------|
|                                      | d                                        | CI           | d                                                                | CI          |
| <i>I. Fear disorders</i>             |                                          |              |                                                                  |             |
| Specific phobia                      | 0.12                                     | 0.07, 0.18   | 0.00                                                             | -0.11, 0.11 |
| Agoraphobia                          | 0.02                                     | -0.12, 0.16  | 0.06                                                             | -0.17, 0.29 |
| Social phobia                        | 0.03                                     | -0.03, 0.09  | 0.11                                                             | -0.05, 0.27 |
| Panic disorder                       | 0.05                                     | -0.09, 0.19  | 0.15                                                             | -0.15, 0.45 |
| <i>II. Distress disorders</i>        |                                          |              |                                                                  |             |
| Separation anxiety disorder          | 0.14                                     | -0.02, 0.29  | 0.11                                                             | -0.19, 0.41 |
| Post-traumatic stress disorder**     | -0.06                                    | -0.18, 0.06  | 0.14                                                             | -0.06, 0.34 |
| Major depressive episode/dysthymia   | -0.08                                    | -0.15, -0.01 | -0.06                                                            | -0.16, 0.04 |
| Generalized anxiety disorder         | 0.07                                     | -0.08, 0.23  | 0.16                                                             | -0.02, 0.34 |
| <i>III. Behavior disorders</i>       |                                          |              |                                                                  |             |
| ADHD                                 | 0.17                                     | 0.05, 0.3    | 0.14                                                             | -0.01, 0.29 |
| Oppositional defiant disorder        | 0.12                                     | 0.03, 0.21   | 0.03                                                             | -0.06, 0.12 |
| Conduct disorder                     | 0.14                                     | 0.03, 0.25   | 0.10                                                             | -0.03, 0.23 |
| Eating disorders                     | 0.08                                     | -0.03, 0.19  | 0.05                                                             | -0.08, 0.18 |
| <i>IV. Substance disorders</i>       |                                          |              |                                                                  |             |
| Alcohol abuse                        | 0.18                                     | 0.09, 0.27   | 0.10                                                             | -0.05, 0.25 |
| Drug abuse                           | 0.10                                     | 0.02, 0.19   | 0.09                                                             | -0.02, 0.2  |
| <i>V. Other disorders</i>            |                                          |              |                                                                  |             |
| Bipolar disorder                     | 0.31                                     | 0.12, 0.49   | 0.06                                                             | -0.36, 0.48 |
| <i>VI. Total number of disorders</i> |                                          |              |                                                                  |             |
| Exactly one disorder                 | 0.04                                     | -0.07, 0.16  | -0.06                                                            | -0.17, 0.05 |
| Exactly two disorders                | 0.04                                     | -0.09, 0.18  | 0.09                                                             | -0.04, 0.22 |
| Three or more disorders              | 0.07                                     | -0.02, 0.16  | 0.20                                                             | 0.11, 0.29  |

\*Adjusted for parental education, parental income, poverty ratio, race/ethnicity, age, and nativity, number of siblings, birth order, and non-focal disorders

\*\* Among those with a lifetime exposure to a potentially traumatic event (N=6160, 61.2% of the total sample).

Supplementary Table 4 - Variation in fluid intelligence\* by current disorder status, separating current disorders into those with onset in the past 12 months and those with onset prior to the past 12 months

|                                      | <i>Past 12 month and Lifetime disorders, all ages</i> |      |       |          | <i>Past 12 month, but not Lifetime disorders, all ages</i> |      |       |          |
|--------------------------------------|-------------------------------------------------------|------|-------|----------|------------------------------------------------------------|------|-------|----------|
|                                      | Mean IQ                                               | SE   | Beta  | p value+ | Mean IQ                                                    | SE   | Beta  | p value+ |
| <i>I. Fear disorders</i>             |                                                       |      |       |          |                                                            |      |       |          |
| Specific phobia                      | 97.9                                                  | 0.39 | -1.3  | 0.005    | 96.7                                                       | 3.11 | -2.49 | 0.42     |
| Agoraphobia                          | 98.8                                                  | 0.98 | -0.45 | 0.65     | 87.5                                                       | 6.27 | -11.8 | 0.12     |
| Social phobia                        | 98.6                                                  | 0.43 | -0.51 | 0.50     | --                                                         | --   | --    | --       |
| Panic disorder                       | 98.4                                                  | 1.04 | -0.9  | 0.52     | --                                                         | --   | --    | --       |
| No fear disorder                     | 99.1                                                  | 0.22 | --    | --       | 99.1                                                       | 0.22 | --    | --       |
| <i>II. Distress disorders</i>        |                                                       |      |       |          |                                                            |      |       |          |
| Separation anxiety disorder          | 96.8                                                  | 1.13 | -1.89 | 0.20     | 98.3                                                       | 4.19 | -0.41 | 0.97     |
| Post-traumatic stress disorder**     | 99.7                                                  | 0.88 | 0.94  | 0.32     | 98.6                                                       | 4.38 | -0.19 | 0.97     |
| Major depressive episode/dysthymia   | 100                                                   | 0.5  | 1.32  | 0.04     | 96.8                                                       | 2.04 | -1.91 | 0.70     |
| Generalized anxiety disorder         | 97.6                                                  | 1.11 | -1.11 | 0.32     | 93.2                                                       | 4.16 | -5.53 | 0.67     |
| No distress disorder                 | 98.8                                                  | 0.25 | --    | --       | 98.8                                                       | 0.25 | --    | --       |
| <i>III. Behavior disorders</i>       |                                                       |      |       |          |                                                            |      |       |          |
| ADHD                                 | 96.3                                                  | 0.91 | -2.91 | 0.006    | 93.6                                                       | 9.8  | -5.63 | 0.90     |
| Oppositional defiant disorder        | 97.3                                                  | 0.66 | -1.81 | 0.01     | 99.2                                                       | 2    | 0.1   | 0.96     |
| Conduct disorder                     | 97.1                                                  | 0.82 | -1.96 | 0.02     | 98.3                                                       | 1.46 | -0.77 | 0.90     |
| Eating disorders                     | 97.9                                                  | 0.82 | -1.28 | 0.12     | --                                                         | --   | --    | --       |
| No behavior disorder                 | 99.1                                                  | 0.21 | --    | --       | 99.1                                                       | 0.21 | --    | --       |
| <i>IV. Substance disorders</i>       |                                                       |      |       |          |                                                            |      |       |          |
| Alcohol abuse                        | 96.5                                                  | 0.67 | -2.6  | <.001    | 97.6                                                       | 2.16 | -1.47 | 0.93     |
| Drug abuse                           | 97.6                                                  | 0.64 | -1.45 | 0.02     | 98.9                                                       | 1.41 | -0.13 | 0.93     |
| No substance disorder                | 99.1                                                  | 0.21 | --    | --       | 99.1                                                       | 0.21 | --    | --       |
| <i>V. Other disorders</i>            |                                                       |      |       |          |                                                            |      |       |          |
| Bipolar disorder                     | 94.3                                                  | 1.69 | -4.88 | 0.004    | 106.6                                                      | 6.3  | 7.4   | 0.24     |
| No bipolar disorder                  | 99.2                                                  | 0.21 | --    | --       | 99.2                                                       | 0.21 | --    | --       |
| <i>VI. Total number of disorders</i> |                                                       |      |       |          |                                                            |      |       |          |
| Exactly one disorder                 | 98.1                                                  | 0.34 | -1.32 | <.001    | 97.8                                                       | 0.77 | -1.03 | 0.05     |
| Exactly two disorders                | 98.1                                                  | 0.48 | -1.37 | 0.006    | 97.6                                                       | 2.98 | -1.29 | 0.66     |

|                         |      |      |       |       |  |      |      |       |      |
|-------------------------|------|------|-------|-------|--|------|------|-------|------|
| Three or more disorders | 97   | 0.49 | -2.48 | <.001 |  | 90.5 | 9.86 | -8.38 | 0.59 |
| No disorder             | 99.6 | 0.25 | --    | --    |  | 99.6 | 0.25 | --    | --   |

\* Scores were first normed in the sample by six-month age groups for mean of 100 and standard deviation of 15. Predicted means were estimated from linear regression models controlling for parental education; race/ethnicity, age, nativity (US born versus not), number of siblings, birth order, and non-focal disorder groups

\*\* Among those with a lifetime exposure to a potentially traumatic event (N=6160, 61.2% of the total sample)

+ P-values are for the comparison between each disorder category to a reference group of no disorder in that category. For example, mean IQ among those with specific phobia is compared to those with no fear disorder. All p-values are false discovery rate adjusted.

10  
11  
12  
13  
14  
15  
16  
17  
18  
19  
20  
21  
22  
23  
24  
25  
26  
27  
28  
29  
30  
31  
32  
33  
34  
35  
36  
37

Supplementary Table 5. Variation in fluid intelligence\* as a function of lifetime psychiatric disorders (N=10,073)

|                                      | Mean IQ | SE   | p value <sup>+</sup> | d     | CI          |
|--------------------------------------|---------|------|----------------------|-------|-------------|
| <i>I. Fear disorders</i>             |         |      |                      |       |             |
| Specific phobia                      | 97.7    | 0.35 | 0.004                | 0.1   | 0.05, 0.14  |
| Agoraphobia                          | 98.2    | 0.83 | 0.44                 | 0.06  | -0.06, 0.17 |
| Social phobia                        | 98.1    | 0.4  | 0.07                 | 0.07  | 0.01, 0.12  |
| Panic disorder                       | 97.3    | 0.93 | 0.14                 | 0.13  | 0, 0.26     |
| No fear disorder                     | 99.1    | 0.22 | --                   | --    |             |
| <i>II. Distress disorders</i>        |         |      |                      |       |             |
| Separation anxiety disorder          | 97      | 0.53 | 0.004                | 0.12  | 0.03, 0.22  |
| Post-traumatic stress disorder**     | 98.2    | 0.75 | 0.58                 | 0.04  | -0.08, 0.16 |
| Major depressive episode/dysthymia   | 99.1    | 0.41 | 0.52                 | -0.02 | -0.1, 0.06  |
| Generalized anxiety disorder         | 96.7    | 0.83 | 0.02                 | 0.14  | 0.01, 0.27  |
| No distress disorder                 | 99      | 0.21 | --                   | --    |             |
| <i>III. Behavior disorders</i>       |         |      |                      |       |             |
| ADHD                                 | 96.1    | 0.69 | <.001                | 0.2   | 0.11, 0.3   |
| Oppositional defiant disorder        | 97.5    | 0.46 | 0.003                | 0.11  | 0.05, 0.18  |
| Conduct disorder                     | 96.4    | 0.6  | <.001                | 0.19  | 0.11, 0.27  |
| Eating disorders                     | 97.6    | 0.61 | 0.05                 | 0.11  | 0.02, 0.19  |
| No behavior disorder                 | 99.2    | 0.21 | --                   | --    |             |
| <i>IV. Substance disorders</i>       |         |      |                      |       |             |
| Alcohol abuse                        | 96.2    | 0.58 | <.001                | 0.2   | 0.12, 0.27  |
| Drug abuse                           | 97.3    | 0.51 | 0.001                | 0.13  | 0.06, 0.2   |
| No substance disorder                | 99.1    | 0.21 | --                   | --    |             |
| <i>V. Other disorders</i>            |         |      |                      |       |             |
| Bipolar disorder                     | 95.55   | 1.22 | 0.007                | 0.21  | 0.04, 0.38  |
| No bipolar disorder                  | 98.9    | 0.2  | --                   | --    |             |
| <i>VI. Total number of disorders</i> |         |      |                      |       |             |
| No disorder                          | 98.8    | 0.21 | --                   | --    |             |
| Exactly one disorder                 | 98.7    | 0.42 | 0.17                 | 0.04  | -0.08, 0.15 |
| Exactly two disorders                | 98.7    | 0.52 | 0.22                 | 0.04  | -0.1, 0.17  |
| Three or more disorders              | 97.7    | 0.37 | <.001                | 0.1   | 0.03, 0.18  |

\* Scores were first normed in the sample by six-month age groups for mean of 100 and standard deviation of 15. Predicted means were estimated from linear regression models controlling for parental education; race/ethnicity, age, nativity (US born versus not), number of siblings, birth order, and non-focal disorder groups

\*\* Among those with a lifetime exposure to a potentially traumatic event (N=6160, 61.2% of the total sample)

\* P-values are for the comparison between each disorder category to a reference group of no disorder in that category. For example, mean IQ among those with specific phobia is compared to those with no fear disorder. All p-values are false discovery rate adjusted.

38  
39  
40  
41  
42  
43  
44  
45  
46  
47  
48  
49  
50  
51  
52  
53  
54  
55  
56  
57  
58  
59  
60  
61  
62  
63  
64  
65  
66  
67  
68  
69  
70

Supplementary Table 6 - Proportion of adolescents with fluid intelligence in low, middle, and high range, separating current disorders into those with onset in the past 12 months and those with onset prior to the past 12 months

| <i>Range (N total)</i>             | <i>Past 12 month and Lifetime disorders, all ages</i> |                        |                      |                      | <i>Past 12 months but not lifetime, all ages</i> |                      |                      |
|------------------------------------|-------------------------------------------------------|------------------------|----------------------|----------------------|--------------------------------------------------|----------------------|----------------------|
|                                    | Low (n=1852)<br>(%)                                   | Middle (n=6757)<br>(%) | High (n=1464)<br>(%) | p-value <sup>+</sup> | Middle (n=6757)<br>(%)                           | High (n=1464)<br>(%) | p-value <sup>+</sup> |
| <i>I. Fear disorders</i>           |                                                       |                        |                      |                      |                                                  |                      |                      |
| Specific phobia                    | 22.5                                                  | 65.13                  | 12.38                | <.001                | 76.19                                            | 0                    | 0.14                 |
| Agoraphobia                        | 25.35                                                 | 58.06                  | 16.59                | 0.009                | 40                                               | 0                    | 0.08                 |
| Social phobia                      | 20.11                                                 | 66.61                  | 13.28                | 0.035                | 0                                                | 0                    | --                   |
| Panic disorder                     | 18.32                                                 | 71.2                   | 10.47                | 0.19                 | 0                                                | 0                    | --                   |
| Any fear disorder                  | 21.02                                                 | 66.13                  | 12.85                | <.001                | 69.23                                            | 0                    | 0.08                 |
| No fear disorder                   | 17.52                                                 | 67.39                  | 15.09                | --                   | 67.07                                            | 14.57                | --                   |
| <i>II. Distress disorders</i>      |                                                       |                        |                      |                      |                                                  |                      |                      |
| Separation anxiety disorder        | 25.93                                                 | 66.05                  | 8.02                 | 0.06                 | 58.33                                            | 8.33                 | 0.64                 |
| Post-traumatic stress disorder**   | 17.36                                                 | 67.36                  | 15.28                | 0.76                 | 63.64                                            | 9.09                 | 0.71                 |
| Major depressive episode/dysthymia | 19.18                                                 | 67.23                  | 13.59                | 0.76                 | 68.09                                            | 6.38                 | 0.44                 |
| Generalized anxiety disorder       | 23.3                                                  | 63.07                  | 13.64                | 0.39                 | 63.64                                            | 9.09                 | 0.71                 |
| Any distress disorder              | 20.24                                                 | 66.48                  | 13.28                | 0.29                 | 65                                               | 7.5                  | 0.20                 |
| No distress disorder               | 18.12                                                 | 67.17                  | 14.71                | --                   | 67.1                                             | 14.59                | --                   |
| <i>III. Behavior disorders</i>     |                                                       |                        |                      |                      |                                                  |                      |                      |
| ADHD                               | 28.34                                                 | 60.32                  | 11.34                | <.001                | 50                                               | 0                    | 0.59                 |
| Oppositional defiant disorder      | 23.16                                                 | 67.21                  | 9.63                 | <.001                | 65.31                                            | 14.29                | 0.85                 |
| Conduct disorder                   | 27.03                                                 | 64.86                  | 8.11                 | <.001                | 73.63                                            | 7.69                 | 0.58                 |
| Eating disorders                   | 24.44                                                 | 62.7                   | 12.86                | 0.005                | 0                                                | 0                    | --                   |
| Any behavior disorder              | 24.64                                                 | 64.55                  | 10.8                 | <.001                | 70.71                                            | 10                   | 0.59                 |
| No behavior disorder               | 17.6                                                  | 67.4                   | 15                   | --                   | 67.03                                            | 14.6                 | --                   |
| <i>IV. Substance disorders</i>     |                                                       |                        |                      |                      |                                                  |                      |                      |
| Alcohol abuse                      | 21.83                                                 | 68.25                  | 9.92                 | 0.007                | 61.9                                             | 11.9                 | 0.39                 |
| Drug abuse                         | 19.53                                                 | 68.61                  | 11.86                | 0.12                 | 76                                               | 9                    | 0.36                 |
| Any substance disorder             | 20.47                                                 | 68.59                  | 10.94                | 0.007                | 71.85                                            | 9.63                 | 0.38                 |
| No substance disorder              | 18.19                                                 | 66.94                  | 14.87                | --                   | 67.02                                            | 14.6                 | --                   |
| <i>V. Other disorders</i>          |                                                       |                        |                      |                      |                                                  |                      |                      |
| Bipolar disorder                   | 28.32                                                 | 61.06                  | 10.62                | 0.01                 | 60                                               | 20                   | 0.94                 |
| No bipolar disorder                | 18.02                                                 | 66.87                  | 15.12                | --                   | 66.87                                            | 15.12                | --                   |

VI. Total number of disorders

|                         |       |       |       |       |       |       |      |
|-------------------------|-------|-------|-------|-------|-------|-------|------|
| Exactly one disorder    | 19.51 | 67.38 | 13.11 | 0.001 | 70.23 | 8.96  | 0.02 |
| Exactly two disorders   | 21.58 | 64.97 | 13.45 | 0.001 | 68.18 | 9.09  | 0.70 |
| Three or more disorders | 23.28 | 65.92 | 10.8  | <.001 | 50    | 0     | 0.64 |
| Any disorder            | 20.88 | 66.47 | 12.66 | <.001 | 70    | 8.92  | 0.02 |
| No disorder             | 16.84 | 67.46 | 15.7  | --    | 66.97 | 14.75 | --   |

\*\* Among those with a lifetime exposure to a potentially traumatic event (N=6160, 61.2% of the total sample)

+ P-values are for chi-square comparisons between each disorder category to a reference group of no disorder in that category. For example, mean IQ among those with specific phobia is compared to those with no fear disorder. All p-values are false discovery rate adjusted.

72  
73  
74  
75  
76  
77  
78  
79  
80  
81  
82  
83  
84  
85  
86  
87  
88  
89  
90  
91  
92  
93  
94  
95  
96  
97

Supplementary Table 7. Unadjusted mean differences in IQ by psychiatric disorder among US adolescents by disorder age of onset

|                                    | <i>Onset age 4-8</i> |      |                      | <i>Onset age 9-12</i> |      |                      | <i>Onset age 13-17</i> |      |                      |
|------------------------------------|----------------------|------|----------------------|-----------------------|------|----------------------|------------------------|------|----------------------|
|                                    | Mean IQ              | SD   | p value <sup>+</sup> | Mean IQ               | SD   | p value <sup>+</sup> | Mean IQ                | SD   | p value <sup>+</sup> |
| <i>I. Fear disorders</i>           |                      |      |                      |                       |      |                      |                        |      |                      |
| Specific phobia                    | 98.1                 | 14.6 | <.001                | 96.3                  | 15.1 | <.001                | 96.9                   | 16   | 0.19                 |
| Agoraphobia                        | 97.6                 | 15.7 | 0.08                 | 96.6                  | 17   | 0.02                 | 95.6                   | 15.5 | 0.06                 |
| Social phobia                      | 98.4                 | 14.4 | 0.01                 | 99.3                  | 15.1 | 0.15                 | 95.6                   | 13.9 | <.001                |
| Panic disorder                     | 99.7                 | 13.3 | 0.79                 | 96.3                  | 13.6 | 0.02                 | 97.1                   | 14.9 | 0.11                 |
| No fear disorder                   | 100.1                | 14.5 | --                   | 100.1                 | 14.5 | --                   | 100.1                  | 14.5 | --                   |
| <i>II. Distress disorders</i>      |                      |      |                      |                       |      |                      |                        |      |                      |
| Separation anxiety disorder        | 96.9                 | 14.8 | <.001                | 96.8                  | 13.9 | 0.02                 | 94.6                   | 15.5 | 0.004                |
| Post-traumatic stress disorder**   | 99                   | 13.4 | 0.89                 | 98.8                  | 16.4 | 0.78                 | 99.5                   | 13.8 | 0.87                 |
| Major depressive episode/dysthymia | 99.4                 | 15   | 0.89                 | 100.5                 | 14   | 0.13                 | 99.1                   | 14.6 | 0.87                 |
| Generalized anxiety disorder       | 98.5                 | 14.1 | 0.89                 | 99.9                  | 13.2 | 0.78                 | 96                     | 16.4 | 0.02                 |
| No distress disorder               | 99.2                 | 14.5 | --                   | 99.2                  | 14.5 | --                   | 99.2                   | 14.5 | --                   |
| <i>III. Behavior disorders</i>     |                      |      |                      |                       |      |                      |                        |      |                      |
| ADHD                               | 97.6                 | 14.7 | 0.01                 | 92.3                  | 16.3 | <.001                | 89                     | 15.5 | 0.002                |
| Oppositional defiant disorder      | 98.1                 | 15.3 | 0.03                 | 98.2                  | 14.6 | 0.02                 | 97.1                   | 15.4 | 0.002                |
| Conduct disorder                   | 102.5                | 13.6 | 0.03                 | 98.7                  | 14.5 | 0.07                 | 97.5                   | 14.6 | 0.003                |
| Eating disorders                   | 95                   | 16.4 | 0.03                 | 97.4                  | 15.2 | 0.02                 | 97.9                   | 14.9 | 0.009                |
| No behavior disorder               | 100.1                | 14.5 | --                   | 100.1                 | 14.5 | --                   | 100.1                  | 14.5 | --                   |
| <i>IV. Substance disorders</i>     |                      |      |                      |                       |      |                      |                        |      |                      |
| Alcohol abuse                      | 109.8                | 11.1 | 0.18                 | 97.4                  | 14.7 | 0.40                 | 97.5                   | 14.8 | 0.002                |
| Drug abuse                         | 84.4                 | 3.8  | 0.07                 | 98.4                  | 13.7 | 0.40                 | 98.3                   | 13.9 | 0.007                |
| No substance disorder              | 99.8                 | 14.6 | --                   | 99.8                  | 14.6 | --                   | 99.8                   | 14.6 | --                   |
| <i>V. Other disorders</i>          |                      |      |                      |                       |      |                      |                        |      |                      |
| Bipolar disorder                   | 92.7                 | 15.9 | 0.03                 | 96.3                  | 16.9 | 0.12                 | 95.1                   | 15.8 | 0.01                 |
| No bipolar disorder                | 99.7                 | 14.6 | --                   | 99.7                  | 14.6 | --                   | 99.7                   | 14.6 | --                   |

\*\* Among those with a lifetime exposure to a potentially traumatic event (N=6160, 61.2% of the total sample)

<sup>+</sup> P-values are for the comparison between each disorder category to a reference group of no disorder in that category. For example, mean IQ among those with specific phobia is compared to those with no fear disorder. All p-values are false discovery rate adjusted.

Supplementary Table 8 - Proportion of adolescents with fluid intelligence in low, middle, and high range as a function of psychiatric disorder age of onset (unadjusted) (N=10,073)

|                                             | <i>Onset age 4-8</i> |            |          |                      | <i>Onset age 9-12</i> |            |          |                      | <i>Onset age 13-17</i> |            |          |                      |
|---------------------------------------------|----------------------|------------|----------|----------------------|-----------------------|------------|----------|----------------------|------------------------|------------|----------|----------------------|
|                                             | Low (%)              | Middle (%) | High (%) | p-value <sup>+</sup> | Low (%)               | Middle (%) | High (%) | p-value <sup>+</sup> | Low (%)                | Middle (%) | High (%) | p-value <sup>+</sup> |
| <i>I. Fear disorders</i>                    |                      |            |          |                      |                       |            |          |                      |                        |            |          |                      |
| Specific phobia                             | 20.76                | 66.58      | 12.65    | ****                 | 24.13                 | 64.76      | 11.11    | **                   | 25.71                  | 65.71      | 8.57     | *                    |
| Agoraphobia                                 | 22.4                 | 60         | 17.6     | *                    | 24.79                 | 60.68      | 14.53    | *                    | 33.33                  | 52.08      | 14.58    | **                   |
| Social phobia                               | 20.14                | 67.45      | 12.41    | *                    | 19.69                 | 64.22      | 16.09    | *                    | 23.66                  | 67.41      | 8.93     | **                   |
| Panic disorder                              | 19.23                | 70.51      | 10.26    | *                    | 19.77                 | 69.77      | 10.47    | *                    | 21.13                  | 69.01      | 9.86     | *                    |
| Any fear disorder                           | 20.73                | 66.34      | 12.82    | ****                 | 20.73                 | 66.34      | 12.82    | ****                 | 20.73                  | 66.34      | 12.82    | ****                 |
| No fear disorder                            | 17.43                | 67.34      | 15.23    | --                   | 17.43                 | 67.34      | 15.23    | --                   | 17.43                  | 67.34      | 15.23    | --                   |
| <i>II. Distress disorders</i>               |                      |            |          |                      |                       |            |          |                      |                        |            |          |                      |
| Separation anxiety disorder                 | 23.35                | 64.88      | 11.78    | ***                  | 21.39                 | 68.45      | 10.16    | *                    | 33.7                   | 56.52      | 9.78     | ****                 |
| Post-traumatic stress disorder <sup>1</sup> | 17.76                | 70.09      | 12.15    | *                    | 21.57                 | 58.82      | 19.61    | *                    | 18.97                  | 67.82      | 13.22    | *                    |
| Major depressive episode/dysthymia          | 18.36                | 68.12      | 13.53    | *                    | 16.36                 | 69.09      | 14.55    | *                    | 20.31                  | 66.11      | 13.59    | *                    |
| Generalized anxiety disorder                | 15.15                | 71.21      | 13.64    | *                    | 14.29                 | 73.47      | 12.24    | *                    | 31.58                  | 54.14      | 14.29    | ****                 |
| Any distress disorder                       | 18.46                | 66.45      | 15.09    | *                    | 18.46                 | 66.45      | 15.09    | *                    | 18.46                  | 66.45      | 15.09    | *                    |
| No distress disorder                        | 18.29                | 67.87      | 13.84    | --                   | 18.29                 | 67.87      | 13.84    | --                   | 18.29                  | 67.87      | 13.84    | --                   |
| <i>III. Behavior disorders</i>              |                      |            |          |                      |                       |            |          |                      |                        |            |          |                      |
| ADHD                                        | 23.24                | 65.44      | 11.31    | **                   | 33.33                 | 58.97      | 7.69     | ***                  | 52.17                  | 39.13      | 8.7      | ****                 |
| Oppositional defiant disorder               | 20.07                | 67.07      | 12.59    | *                    | 21.4                  | 66.51      | 12.09    | *                    | 24.84                  | 61.64      | 13.52    | **                   |
| Conduct disorder                            | 11.41                | 70.11      | 18.48    | **                   | 20.05                 | 67.45      | 12.5     | *                    | 20.88                  | 68.01      | 11.11    | *                    |
| Eating disorders                            | 35.71                | 47.62      | 16.67    | ***                  | 23.71                 | 65.46      | 10.82    | *                    | 20.89                  | 65.51      | 13.61    | *                    |
| Any behavior disorder                       | 22.89                | 64.67      | 12.44    | ****                 | 22.89                 | 64.67      | 12.44    | ****                 | 22.89                  | 64.67      | 12.44    | ****                 |
| No behavior disorder                        | 17.29                | 67.67      | 15.04    | --                   | 17.29                 | 67.67      | 15.04    | --                   | 17.29                  | 67.67      | 15.04    | --                   |
| <i>IV. Substance disorders</i>              |                      |            |          |                      |                       |            |          |                      |                        |            |          |                      |
| Alcohol abuse                               | --                   | 75         | 25       | --                   | 21.57                 | 70.59      | 7.84     | *                    | 21.81                  | 68.01      | 10.18    | ***                  |
| Drug abuse                                  | 50                   | 50         | --       | --                   | 20.99                 | 72.84      | 6.17     | *                    | 19.22                  | 69.41      | 11.38    | **                   |
| Any substance disorder                      | 19.98                | 69.42      | 10.59    | ****                 | 19.98                 | 69.42      | 10.59    | ****                 | 19.98                  | 69.42      | 10.59    | ****                 |
| No substance disorder                       | 18.18                | 66.78      | 15.05    | --                   | 18.18                 | 66.78      | 15.05    | --                   | 18.18                  | 66.78      | 15.05    | --                   |
| <i>V. Other disorders</i>                   |                      |            |          |                      |                       |            |          |                      |                        |            |          |                      |
| Bipolar disorder                            | 35                   | 55         | 10       | *                    | 25.53                 | 63.83      | 10.64    | *                    | 27.94                  | 63.24      | 8.82     | *                    |
| No bipolar disorder                         | 18.25                | 67.15      | 14.6     | --                   | 18.25                 | 67.15      | 14.6     | --                   | 18.25                  | 67.15      | 14.6     | --                   |

<sup>1</sup>Among those with a lifetime exposure to a potentially traumatic event (N=6160, 61.2% of the total sample)

<sup>+</sup> P-values are for chi-square comparisons between each disorder category to a reference group of no disorder in that category. For example, mean IQ among those with specific phobia is compared to those with no fear disorder. All p-values are false discovery rate adjusted. \* =  $p < 0.05$ ; \*\* =  $p < 0.05$ ; \*\*\* =  $p < 0.01$ ; \*\*\*\* =  $p < 0.001$

102  
103  
104  
105  
106  
107  
108  
109  
110  
111  
112  
113  
114  
115  
116  
117  
118  
119  
120  
121  
122  
123  
124  
125  
126  
127  
128  
129  
130  
131  
132  
133

Supplementary table 9 - Adjusted IQ differences as a function of psychiatric disorder age of onset in a population representation sample of adolescents (N=10,073)

|                                    | <i>Onset age 4-8</i> |      |                      | <i>Onset age 9-12</i> |      |                      | <i>Onset age 13-17</i> |      |                      |
|------------------------------------|----------------------|------|----------------------|-----------------------|------|----------------------|------------------------|------|----------------------|
|                                    | Mean IQ              | SE   | p value <sup>+</sup> | Mean IQ               | SE   | p value <sup>+</sup> | Mean IQ                | SE   | p value <sup>+</sup> |
| <i>I. Fear disorders</i>           |                      |      |                      |                       |      |                      |                        |      |                      |
| Specific phobia                    | 98.2                 | 0.38 | 0.56                 | 97.6                  | 0.8  | 0.63                 | 96.6                   | 2.4  | 0.80                 |
| Agoraphobia                        | 99.1                 | 1.27 | 0.56                 | 98.6                  | 1.32 | 0.63                 | 97.9                   | 2.03 | 0.80                 |
| Social phobia                      | 98.3                 | 0.61 | 0.02                 | 99.3                  | 0.58 | 0.35                 | 96.4                   | 0.96 | 0.03                 |
| Panic disorder                     | 99.9                 | 1.6  | 0.56                 | 96.3                  | 1.53 | 0.63                 | 98.3                   | 1.67 | 0.75                 |
| No fear disorder                   | 99.1                 | 0.22 | --                   | 99.1                  | 0.22 | --                   | 99.1                   | 0.22 | --                   |
| <i>II. Distress disorders</i>      |                      |      |                      |                       |      |                      |                        |      |                      |
| Separation anxiety disorder        | 97.4                 | 0.66 | 0.08                 | 98.1                  | 1.04 | 0.68                 | 95.9                   | 1.46 | 0.28                 |
| Post-traumatic stress disorder**   | 98.5                 | 1.37 | 0.70                 | 99.1                  | 1.41 | 0.68                 | 99.2                   | 1.12 | 0.96                 |
| Major depressive episode/dysthymia | 99.8                 | 1.01 | 0.70                 | 100.2                 | 0.67 | 0.68                 | 99.1                   | 0.59 | 0.28                 |
| Generalized anxiety disorder       | 98.8                 | 1.76 | 0.04                 | 98.6                  | 1.44 | 0.47                 | 95.5                   | 1.25 | 0.28                 |
| No distress disorder               | 98.8                 | 0.25 | --                   | 98.8                  | 0.25 | --                   | 98.8                   | 0.25 | --                   |
| <i>III. Behavior disorders</i>     |                      |      |                      |                       |      |                      |                        |      |                      |
| ADHD                               | 97.5                 | 0.8  | 0.11                 | 94.2                  | 1.6  | 0.21                 | 92.8                   | 2.9  | 0.67                 |
| Oppositional defiant disorder      | 97.6                 | 0.84 | 0.15                 | 98.6                  | 0.69 | 0.94                 | 97.7                   | 0.81 | 0.67                 |
| Conduct disorder                   | 101.1                | 1.03 | 0.40                 | 98.9                  | 0.73 | 0.15                 | 98.4                   | 0.83 | 0.67                 |
| Eating disorders                   | 95.4                 | 2.14 | 0.50                 | 97.9                  | 1.02 | 0.21                 | 98.7                   | 0.82 | 0.67                 |
| No behavior disorder               | 99.1                 | 0.21 | --                   | 99.1                  | 0.21 | --                   | 99.1                   | 0.21 | --                   |
| <i>IV. Substance disorders</i>     |                      |      |                      |                       |      |                      |                        |      |                      |
| Alcohol abuse                      | 110.7                | 6.98 | <.001                | 97.1                  | 1.97 | 0.09                 | 96.6                   | 0.62 | 0.81                 |
| Drug abuse                         | 87.1                 | 6.95 | 0.01                 | 98.6                  | 1.57 | 0.13                 | 97.7                   | 0.55 | 0.81                 |
| No substance disorder              | 99                   | 0.21 | --                   | 99                    | 0.21 | --                   | 99                     | 0.21 | --                   |
| <i>V. Other disorders</i>          |                      |      |                      |                       |      |                      |                        |      |                      |
| Bipolar disorder                   | 94                   | 3.12 | 0.16                 | 98.4                  | 2.05 | 0.49                 | 96.4                   | 1.73 | 0.47                 |
| No bipolar disorder                | 98.9                 | 0.2  | --                   | 98.9                  | 0.2  | --                   | 98.9                   | 0.2  | --                   |
